# Supplementary material
Source: PubMed Central journal article supplement (PMC7058483)
Supplement: NIHMS1554725-supplement-1.pdf [file NIHMS1554725-supplement-1.pdf]

## **Supplemental Information**

### **Materials in this Supplemental Information:**

**Figure S1. Four modes of interaction between dimers of IF proteins (Related to Figure 4).**

**Figure S2. Crystal contacts of K5/K14 wildtype 2B complex and of K5/K14-C367A mutant 2B complex (Related to Figures 1 and 2).**

**Figure S3. Sequence alignment of type I and type II keratins in the 2B region of the rod domain (Related to Figures 1 and 2).**

**Figure S4. Transmission electron microscopy images of the negative-stained filaments of K5/K14 wildtype, ID1\_AAA mutant or ID7\_AAA mutant (Related to Figure 3).**

**Table S1. List of ID contacts found in K5/K14-C367A 2B complex (Related to Figures 1 and 2)**

**Table S2. Summary of the results from PISA and the mutated residues for interaction deficiencies (Related to Figures 1 and 2)**

**Table S3. Sequences of the oligonucleotide primers used for mutagenesis to produce ID-deficient mutants (Related to Key Resources Table of the STAR METHODS).**

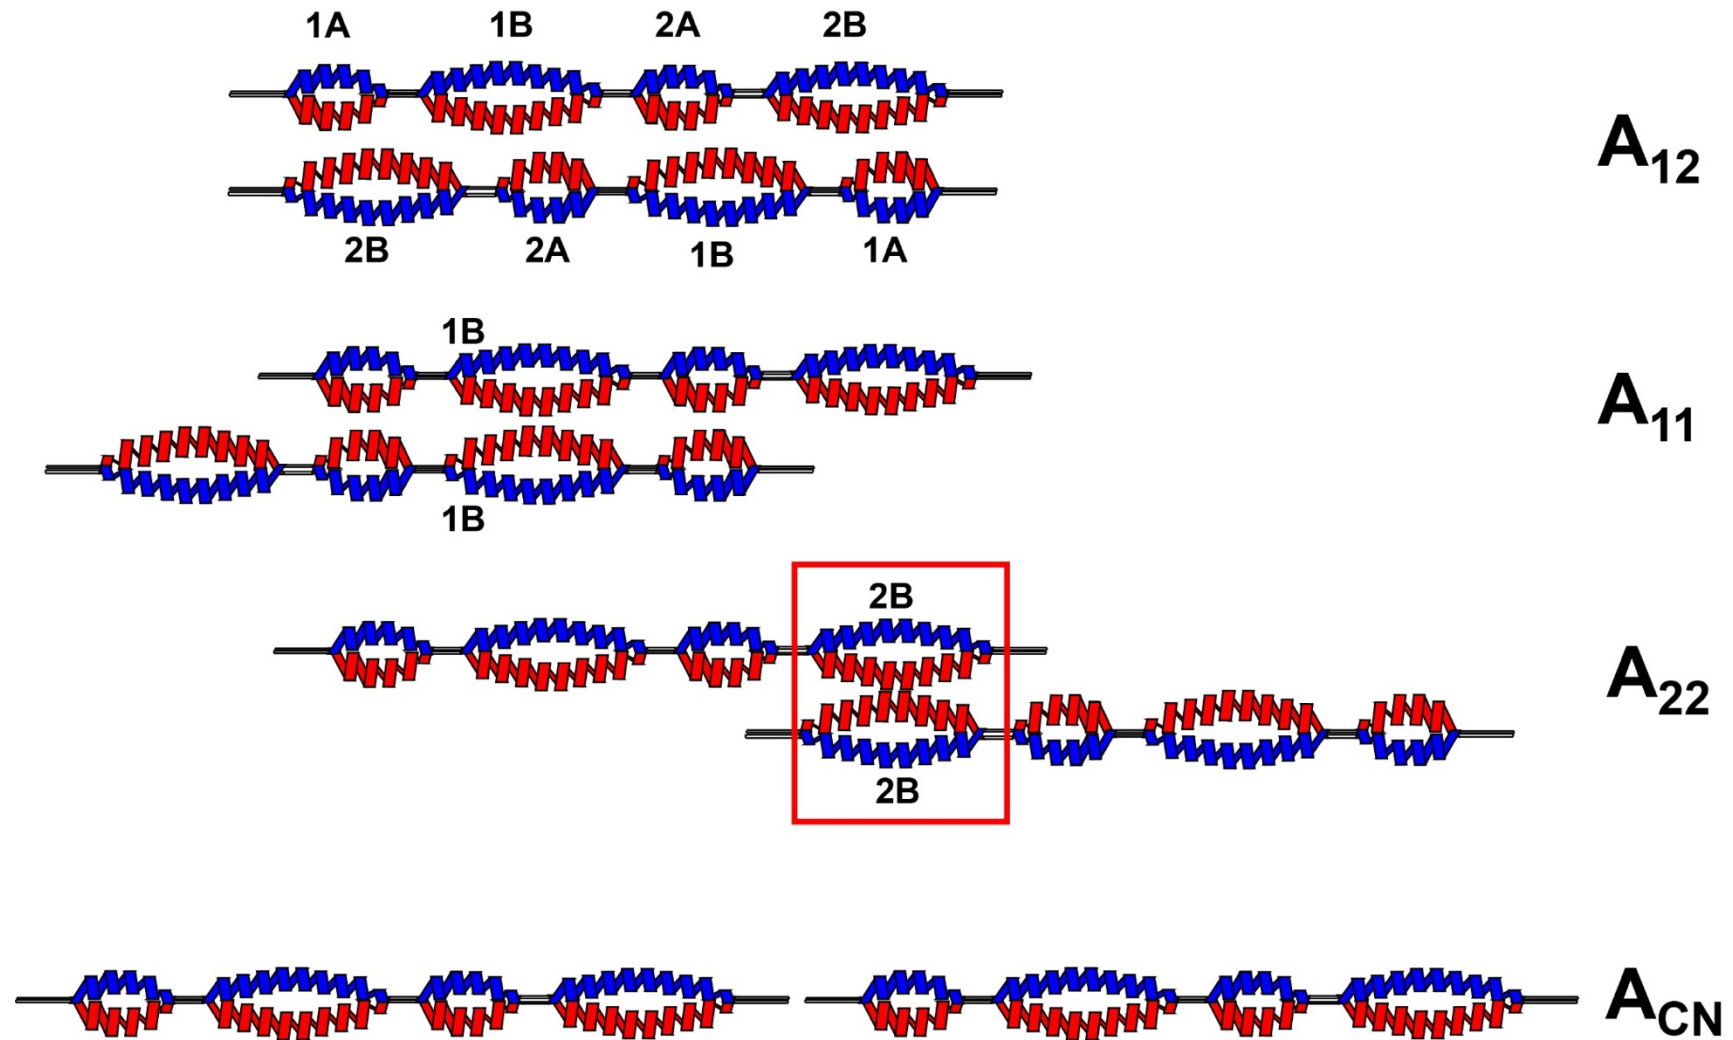

**Figure S1. Four modes of interaction between dimers of IF proteins (Related to Figure 4).** These alignments are named  $A_{11}$ ,  $A_{12}$ ,  $A_{22}$ , and  $A_{CN}$  reflecting the name of the interacting domains involved (Herrmann and Aebi, *Curr Opin Struct Biol.* 8:177-185, 1998). The interaction modes were suggested from nearest neighbor analysis using chemical cross-linking coupled to mass analysis, complemented by site-directed mutagenesis (Strelkov et al., *BioEssays* 25:243-251, 2003). The red chains and the blue chains represent type I keratins and type II keratins, respectively.

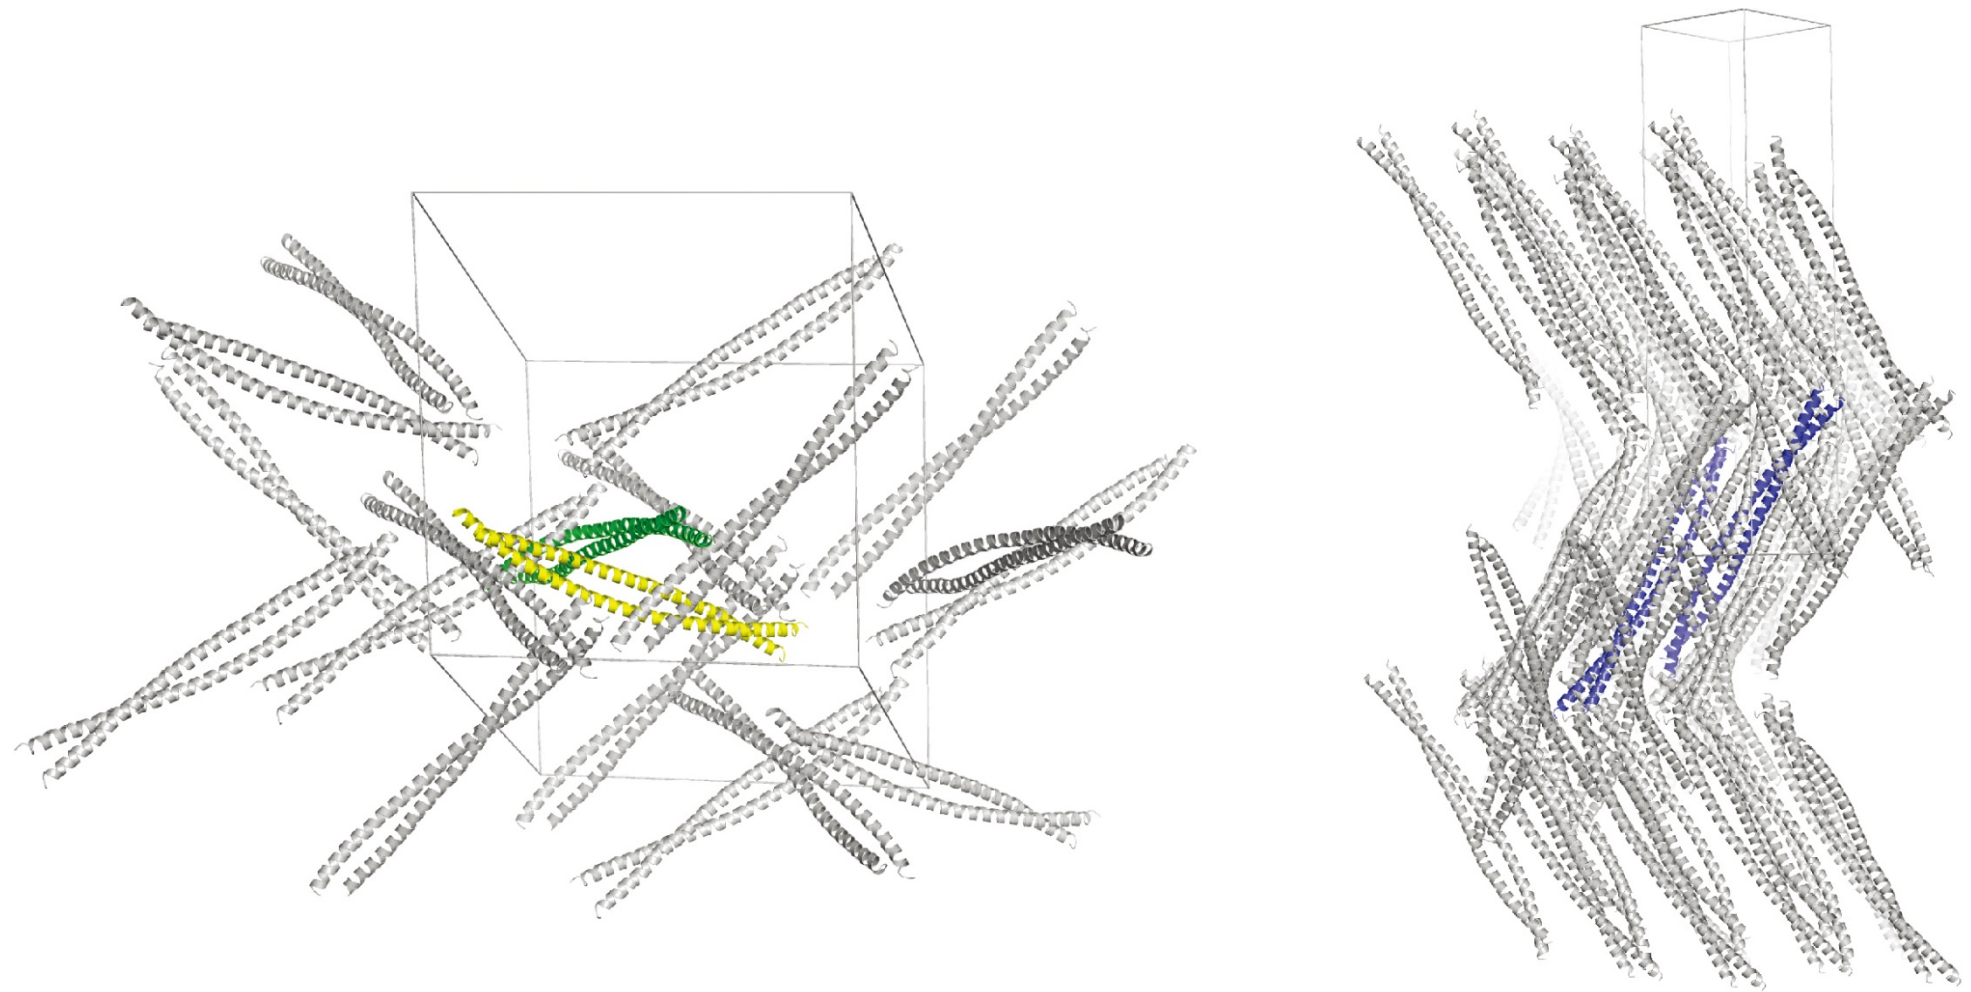

**Figure S2. Crystal contacts of K5/K14 wildtype 2B complex and of K5/K14-C367A mutant 2B complex (Related to Figures 1 and 2).** (Left) The crystal contact of wild-type K5/14 2B (PDB ID : 3TNU). the single K5/14 2B heterodimeric coiled-coil helix in asymmetric unit shown in green color and symmetry related molecule making disulfide bond shown in yellow color. (Right) The crystal contact of C367A mutant of K5/14 2B complex (PDB ID: 6JFV). Two heterodimeric molecules in asymmetric unit are shown in blue color. The unit cell is also shown in line.



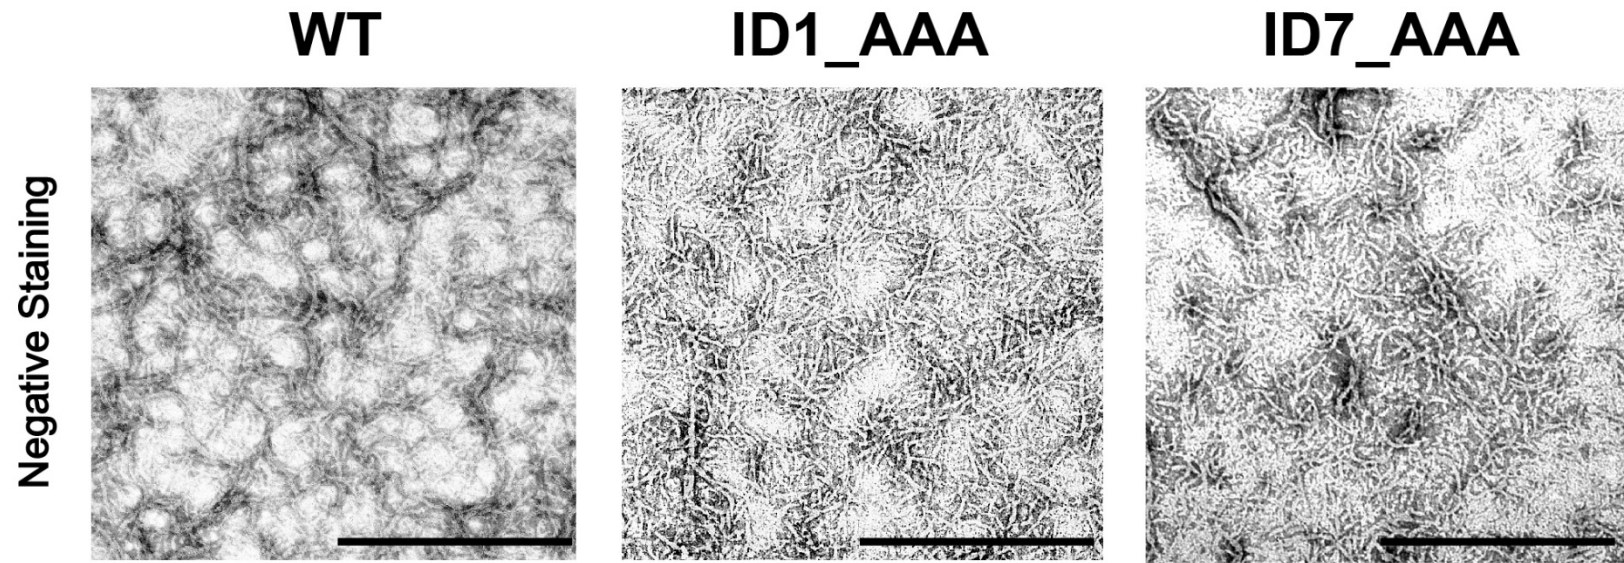

**Figure S4.** Transmission electron microscopy images of the negative-stained filaments of K5/K14 wildtype, ID1\_AAA mutant or ID7\_AAA mutant (Related to Figure 3). Bar, 200 nm.

| Contact ID | Interface area (Å <sup>2</sup> ) | Coiled-coil Alignment | Symmetry Operation |
|------------|----------------------------------|-----------------------|--------------------|
| ID1        | 805.7                            | Anti-parallel         | x, y-1, z          |
| ID3        | 760.9                            | parallel              | -y+1, x, z+1/4     |
| ID5        | 362.3                            | T-shape               | -y+1, x, z+1/4     |
| ID7        | 215.3                            | Anti-parallel         | x, y, z            |
| ID8        | 190.8                            | N/A                   | -x, -y+1, z-1/2    |
| ID9        | 40.3                             | N/A                   | -y+1, x+2, z+1/4   |
| ID10       | 16.3                             | N/A                   | -x, -y+2, z-1/2    |
| ID11       | 6.5                              | N/A                   | -y+1, x+1, z+1/4   |

**Table S1.** List of ID contacts found in K5/K14-C367A 2B complex (Related to Figures 1 and 2)

| average values | ID1                               |                                          |          | ID3                               |                                          |         | ID7                               |                                   |  |
|----------------|-----------------------------------|------------------------------------------|----------|-----------------------------------|------------------------------------------|---------|-----------------------------------|-----------------------------------|--|
|                | interface area (Å <sup>2</sup> )  | Δ'G (kcal/mol)                           |          | interface area (Å <sup>2</sup> )  | Δ'G (kcal/mol)                           |         | interface area (Å <sup>2</sup> )  | Δ'G (kcal/mol)                    |  |
|                | 805.7                             | -4.5                                     |          | 362.3                             | -2.1                                     |         | 215.3                             | 1.7                               |  |
| dimer 1        | interacting residue (inter-dimer) | Comment                                  | dimer 1  | interacting residue (inter-dimer) | comment                                  | dimer 1 | interacting residue (inter-dimer) | comment                           |  |
| K14-I331       | -                                 |                                          | K14-M351 | -                                 |                                          | K5-K426 | -                                 |                                   |  |
| K14-R335       | K5-E475                           | mutated to Alanine for deficiency        | K14-S354 | K5-Q454                           |                                          | K5-N430 | -                                 |                                   |  |
| K14-M338       | K5-L474                           |                                          | K14-L355 | -                                 |                                          | K5-A433 | -                                 |                                   |  |
| K14-Q339       | K5-E475                           |                                          | K14-S358 | K5-Q454                           |                                          | K5-E434 | -                                 |                                   |  |
| K14-E342       | K5-R471<br>K14-Y415               | mutated to Alanine for deficiency        | K14-E361 | K5-L461                           |                                          | K5-E437 | K5-R451                           | mutated to Alanine for deficiency |  |
| K14-I343       | K5-R471                           |                                          | K14-T362 | -                                 |                                          | K5-Q440 | K5-Q444                           | mutated to Alanine for deficiency |  |
| K14-L345       | K14-T414                          |                                          | K14-R365 | K5-D464                           | mutated to Alanine for deficiency        | K5-Q444 | K5-Q440                           | mutated to Alanine for deficiency |  |
| K14-Q346       | K14-E411                          | mutated to Alanine for deficiency        | K14-Y366 | K5-K460                           | mutated to Phenylalanine for deficiency  | K5-R448 | -                                 |                                   |  |
| K14-L349       | K14-Q410<br>K14-E411              |                                          | K14-Q369 | -                                 |                                          | K5-N458 | -                                 |                                   |  |
| K14-S350       | -                                 |                                          | K14-Q372 | K5-R471                           | mutated to Alanine for deficiency        | dimer 2 | interaction                       | note                              |  |
| K14-K352       | K14-Q410                          |                                          | K5-K404  | -                                 | K404E (WC*)                              | K5-K426 | -                                 |                                   |  |
| K14-A353       | K14-R407                          |                                          | K5-C407  | -                                 |                                          | K5-N430 | -                                 |                                   |  |
| K14-E356       | K14-Q410                          |                                          | K5-A408  | -                                 |                                          | K5-A433 | -                                 |                                   |  |
| K14-N357       | K14-D403,<br>K14-K399             |                                          | K5-Q411  | K14-Q394<br>K5-L450               | mutated to Alanine for deficiency        | K5-E434 | -                                 |                                   |  |
| K14-E360       | K14-K399                          |                                          | K5-N412  | K14-E397                          | mutated to Alanine for deficiency        | K5-E437 | K5-R451                           |                                   |  |
| K14-E361       | K14-K399                          |                                          | K5-I414  | K5-Y453<br>K5-M457                |                                          | K5-Q440 | K5-Q444                           | mutated to Alanine for deficiency |  |
| K5-E385        | -                                 |                                          | K5-A415  | K14-E397                          |                                          | K5-K441 | -                                 |                                   |  |
| K5-E388        | -                                 |                                          | K5-D416  | -                                 |                                          | K5-Q444 | K5-Q440                           | mutated to Alanine for deficiency |  |
| K5-M389        | K5-E475                           |                                          | K5-E418  | K5-K460<br>K14-L401               |                                          | K5-D445 | -                                 |                                   |  |
| K5-M392        | K5-L474<br>K14-L419               |                                          | K5-Q419  | -                                 |                                          | K5-R448 | -                                 |                                   |  |
| K5-R395        | K14-E420                          |                                          | K5-E422  | K14-R407                          | mutated to Alanine for deficiency        | K5-R451 | K5-E437                           | mutated to Alanine for deficiency |  |
| K5-L396        | -                                 |                                          | K5-R429  | -                                 |                                          | K5-N458 | -                                 |                                   |  |
| K5-E399        | K14-R417                          | mutated to Alanine for deficiency        | dimer 2  | interaction                       | note                                     |         |                                   |                                   |  |
| K5-V403        | -                                 |                                          | K14-Q394 | K5-Q411                           |                                          |         |                                   |                                   |  |
| dimer 2        | interaction                       | note                                     | K14-E397 | K5-N412<br>K5-A415                |                                          |         |                                   |                                   |  |
| K14-K399       | K14-E360<br>K14-E361              |                                          | K14-I400 | -                                 |                                          |         |                                   |                                   |  |
| K14-D403       | K14-N357                          |                                          | K14-L401 | K5-E418                           | L401P (WC*)                              |         |                                   |                                   |  |
| K14-T406       | -                                 |                                          | K14-V404 | -                                 |                                          |         |                                   |                                   |  |
| K14-R407       | K14-A353                          |                                          | K14-R407 | K5-E422                           |                                          |         |                                   |                                   |  |
| K14-Q410       | K14-E356                          |                                          | K14-E411 | -                                 | E411K (DM*, K*)                          |         |                                   |                                   |  |
| K14-E411       | K14-Q346<br>K14-L349              | E411K (DM*, K*)                          | K5-M446  | -                                 |                                          |         |                                   |                                   |  |
| K14-T414       | K14-L345                          |                                          | K5-A447  | -                                 |                                          |         |                                   |                                   |  |
| K14-Y415       | K14-E342                          | Y415H (K*, DM*)<br>Y145C (WC*)           | K5-L450  | K5-Q411                           |                                          |         |                                   |                                   |  |
| K14-R417       | K5-E399                           | R417P (DM*)                              | K5-R451  | -                                 |                                          |         |                                   |                                   |  |
| K14-L418       | -                                 | L418V (K*)                               | K5-Y453  | K5-I414                           |                                          |         |                                   |                                   |  |
| K14-L419       | K5-M392                           | L419Q (DM*)                              | K5-Q454  | K14-S354<br>K14-S358              |                                          |         |                                   |                                   |  |
| K14-G421       | -                                 |                                          | K5-M457  | K5-I414                           |                                          |         |                                   |                                   |  |
| K5-I467        | -                                 | I467L (WC*)<br>I467M (K*)<br>I467T (DM*) | K5-N458  | -                                 |                                          |         |                                   |                                   |  |
| K5-R471        | K14-E342<br>K14-I343              | R471C (K*)                               | K5-K460  | K5-E418<br>K14-Y366               |                                          |         |                                   |                                   |  |
| K5-L474        | K14-M338                          |                                          | K5-L461  | K14-E361                          |                                          |         |                                   |                                   |  |
| K5-E475        | K14-R335<br>K14-Q339              | E475K (DM*)<br>E475G (DM*)               | K5-D464  | K14-R365                          |                                          |         |                                   |                                   |  |
| K5-G476        | -                                 | G476D (WC, EPPK*)                        | K5-V465  | -                                 |                                          |         |                                   |                                   |  |
|                |                                   |                                          | K5-I467  | -                                 | I467L (WC*)<br>I467M (K*)<br>I467T (DM*) |         |                                   |                                   |  |
|                |                                   |                                          | K5-A468  | -                                 |                                          |         |                                   |                                   |  |
|                |                                   |                                          | K5-R471  | K14-Q372                          | R471C (K*)                               |         |                                   |                                   |  |
|                |                                   |                                          | K5-E475  | -                                 | E475K (DM*)<br>E475G (DM*)               |         |                                   |                                   |  |

**Table S2. Summary of the results from PISA and the mutated residues for interaction deficiencies  
(Related to Figures 1 and 2)**

\*Note: Relevance to genetic skin disease is highlighted. Abbreviations are as follow: **DM**, Epidermolysis bullosa simplex, Dowling-Meara variant; **EPPK**, Epidermolytic palmoplantar keratoderma; **K**, Epidermolysis bullosa simplex, Koebner (generalized) variant; **WC**, Epidermolysis bullosa simplex, Weber-Cockayne (localized) variant.



| Mutant | Primer Name      | Sequence (5'->3')                                                                                 |
|--------|------------------|---------------------------------------------------------------------------------------------------|
| ID1    | ID1_K5E_PvuI_F   | CCAGAGGCTGAGAGCCGCGATCGACAATGTCAAGAAACAGTGC                                                       |
|        | ID1_K5E_PvuI_R   | GCACTGTTTCTTGACATTGTCGATCGCGGCTCTCAGCCTCTGGATCA TCCGG                                             |
|        | ID1_K14REQ_F     | CGAGATCTCGGAGCTCGCGCGCACCATGCAGAACCTGGCGATTGAGCTGGCGTCCC<br>AGCTCAGCATGAAAGC                      |
|        | ID1_K14_K14REQ_R | CCAGTTCTGCATGGTGC GCGGAGCTCCGAGATCTCGCTCTTGCCGC TCTGC                                             |
| ID3    | ID3_K5QNE_NotI_F | GCCGAGATTGACAATGTCAAGAAACAGTGC GCCAATCTGGCGCCGCCATTGCGG<br>ATGCCGAGCAGCGTGGGGCGCTGGCCCTCAAGGATGCC |
|        | ID3_K5QNE_NotI_R | GCGGCCGCCAGATTGGCGCACTGTTTCTTGACATTGTCAATCTCGGCTCTCAGCC<br>TCTGGATCATCCGG                         |
|        | ID3_K14RYQ_F     | GGAGGAGACCAAAGGTGCCTTCTGCATGCAGCTGGCCGCGATCCAGGAGATGATTGG                                         |
|        | ID3_K14RYQ_R     | GGCCAGCTGCATGCAGAAAGCACCTTTGGTCTCCTCCAGGCTGTCTCCAGGG                                              |
| ID7    | ID7_K5AAA_F      | GGATGCCAGGAACAAGCTGGCCGAGCTGGAGGCAGCGCTGGCGAAGGCAAGG<br>CGGACATGGCCCGGCTGCTGCGTGAGTACCAGG         |
|        | ID7_K5AAA_R      | CCTGGTACTCACGCAGCAGCCGGCCATGTCCGCCTTGGCCTTCGCCAGCGCTGC<br>CTCCAGCTCGGCCAGCTTGTTCCTGGCATCC         |

**Table S3. Sequences of the oligonucleotide primers used for mutagenesis to produce ID-deficient mutants (Related to Key Resources Table of the STAR METHODS).**
